# Supplementary material for: WGNAM: whole-genome nested association mapping
Source: Springer Nature journal article supplement (doi:10.1007/s00122-022-04107-x), 2022-05-21
Supplement: MOESM1 [file 122_2022_4107_MOESM1_ESM.pdf]

<sup>1</sup> Department of Agriculture and Fisheries, Leslie Research Facility, Toowoomba, QLD 4350, Australia

<sup>2</sup> The University of Queensland, Queensland Alliance for Agriculture and Food Innovation (QAAFI), Leslie Research Facility, Toowoomba, QLD 4350, Australia

<sup>3</sup> Data61, CSIRO, Atherton, QLD 4883, Australia

Corresponding author: Maria Valeria Paccapelo (E-mail: Valeria.Paccapelo@daf.qld.gov.au)

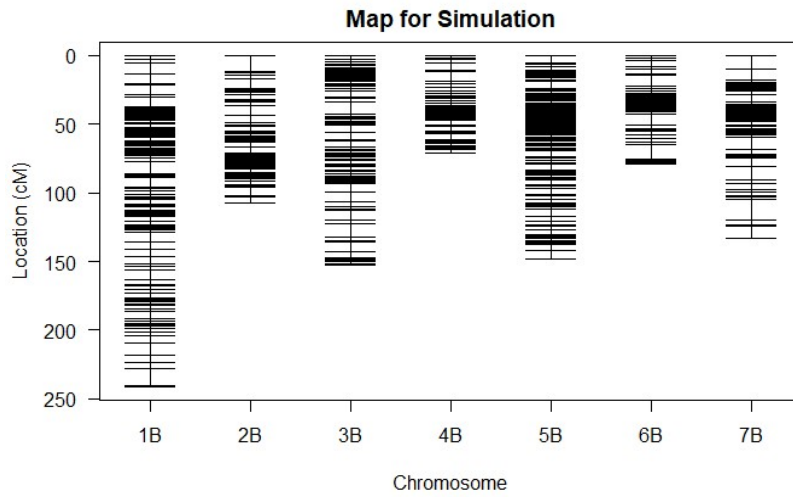

Supplementary Figure 1: Subset of the DArT consensus map used for the simulated data

Theoretical and Applied Genetics

WGNAM: whole-genome nested association mapping

Maria Valeria Paccapelo<sup>1</sup>, Alison M. Kelly<sup>1</sup>, Jack T. Christopher<sup>2</sup>, and Arūnas P. Verbyla<sup>3</sup>

<sup>1</sup> Department of Agriculture and Fisheries, Leslie Research Facility, Toowoomba, QLD 4350, Australia

<sup>2</sup> The University of Queensland, Queensland Alliance for Agriculture and Food Innovation (QAAFI), Leslie Research Facility, Toowoomba, QLD 4350, Australia

<sup>3</sup> Data61, CSIRO, Atherton, QLD 4883, Australia

Corresponding author: Maria Valeria Paccapelo (E-mail: Valeria.Paccapelo@daf.qld.gov.au)

**Supplementary Table 1:** Complete list of putative QTL for plant height in WAR15 and WAR16. For each experiment, putative QTL identified location, position and cloneID (in consensus map DArT, 2018) are shown. For overall effects, percentage of genetic variance attributed to the putative QTL [%var] and LOGP score are given whereas for specific effects the founder name, size and LOGP score are provided.

| Order | Experiment | Iteration | LG | Distance (cM) | Marker    | CloneID | Founder     | Founder Specific |             |       | Overall      |       |        |
|-------|------------|-----------|----|---------------|-----------|---------|-------------|------------------|-------------|-------|--------------|-------|--------|
|       |            |           |    |               |           |         |             | Size             | Probability | Score | Probability2 | % var | Score2 |
| 1     | WAR15      | 2         | 1A | 66.23         | LG.1A.48  | 1011620 | Dharwah dry | 0.751            | 0.438       | 0.36  | 0.01         | 5.5   | 2      |
| 2     | WAR15      | 2         | 1A | 66.23         | LG.1A.48  | 1011620 | Drysdale    | -0.513           | 0.457       | 0.34  |              |       |        |
| 3     | WAR15      | 2         | 1A | 66.23         | LG.1A.48  | 1011620 | EGA Gregory | -0.167           | 0.486       | 0.31  |              |       |        |
| 4     | WAR15      | 2         | 1A | 66.23         | LG.1A.48  | 1011620 | EGA Wylie   | -0.28            | 0.477       | 0.32  |              |       |        |
| 5     | WAR15      | 2         | 1A | 66.23         | LG.1A.48  | 1011620 | FAC10.16    | 0.016            | 0.499       | 0.3   |              |       |        |
| 6     | WAR15      | 2         | 1A | 66.23         | LG.1A.48  | 1011620 | Mace        | 7.572            | 0.007       | 2.16  |              |       |        |
| 7     | WAR15      | 2         | 1A | 66.23         | LG.1A.48  | 1011620 | UQ114       | 0.096            | 0.492       | 0.31  |              |       |        |
| 8     | WAR15      | 2         | 1A | 66.23         | LG.1A.48  | 1011620 | SB062       | 1.104            | 0.41        | 0.39  |              |       |        |
| 9     | WAR15      | 2         | 1A | 66.23         | LG.1A.48  | 1011620 | Scout       | -2.782           | 0.182       | 0.74  |              |       |        |
| 10    | WAR15      | 2         | 1A | 66.23         | LG.1A.48  | 1011620 | SeriM82     | -4.455           | 0.047       | 1.33  |              |       |        |
| 11    | WAR15      | 2         | 1A | 66.23         | LG.1A.48  | 1011620 | Suntop      | -1.155           | 0.35        | 0.46  |              |       |        |
| 12    | WAR15      | 2         | 1A | 66.23         | LG.1A.48  | 1011620 | Westonia    | -0.242           | 0.48        | 0.32  |              |       |        |
| 13    | WAR15      | 2         | 1A | 66.23         | LG.1A.48  | 1011620 | ZWB10.37    | -0.402           | 0.464       | 0.33  |              |       |        |
| 14    | WAR15      | 2         | 1A | 66.23         | LG.1A.48  | 1011620 | ZWW10.50    | 0.455            | 0.462       | 0.33  |              |       |        |
| 15    | WAR15      | 24        | 1A | 105.82        | LG.1A.106 | 2261453 | Dharwah dry | -0.138           | 0.474       | 0.32  | 0.104        | 2     | 0.98   |
| 16    | WAR15      | 24        | 1A | 105.82        | LG.1A.106 | 2261453 | Drysdale    | -0.926           | 0.306       | 0.51  |              |       |        |
| 17    | WAR15      | 24        | 1A | 105.82        | LG.1A.106 | 2261453 | EGA Gregory | -0.05            | 0.493       | 0.31  |              |       |        |
| 18    | WAR15      | 24        | 1A | 105.82        | LG.1A.106 | 2261453 | EGA Wylie   | 0.661            | 0.377       | 0.42  |              |       |        |
| 19    | WAR15      | 24        | 1A | 105.82        | LG.1A.106 | 2261453 | FAC10.16    | -0.059           | 0.488       | 0.31  |              |       |        |
| 20    | WAR15      | 24        | 1A | 105.82        | LG.1A.106 | 2261453 | Mace        | 3.691            | 0.018       | 1.74  |              |       |        |
| 21    | WAR15      | 24        | 1A | 105.82        | LG.1A.106 | 2261453 | UQ114       | 1.175            | 0.258       | 0.59  |              |       |        |
| 22    | WAR15      | 24        | 1A | 105.82        | LG.1A.106 | 2261453 | SB062       | -3.692           | 0.039       | 1.41  |              |       |        |
| 23    | WAR15      | 24        | 1A | 105.82        | LG.1A.106 | 2261453 | Scout       | 2.793            | 0.089       | 1.05  |              |       |        |
| 24    | WAR15      | 24        | 1A | 105.82        | LG.1A.106 | 2261453 | SeriM82     | -1.627           | 0.21        | 0.68  |              |       |        |
| 25    | WAR15      | 24        | 1A | 105.82        | LG.1A.106 | 2261453 | Suntop      | -0.987           | 0.247       | 0.61  |              |       |        |
| 26    | WAR15      | 24        | 1A | 105.82        | LG.1A.106 | 2261453 | Westonia    | 0.197            | 0.466       | 0.33  |              |       |        |
| 27    | WAR15      | 24        | 1A | 105.82        | LG.1A.106 | 2261453 | ZWB10.37    | -1.174           | 0.317       | 0.5   |              |       |        |
| 28    | WAR15      | 24        | 1A | 105.82        | LG.1A.106 | 2261453 | ZWW10.50    | 0.137            | 0.48        | 0.32  |              |       |        |
| 29    | WAR15      | 26        | 1B | 113.49        | LG.1B.143 | 1229218 | Dharwah dry | -0.054           | 0.49        | 0.31  | 0.336        | 2.5   | 0.47   |
| 30    | WAR15      | 26        | 1B | 113.49        | LG.1B.143 | 1229218 | Drysdale    | 0.08             | 0.484       | 0.31  |              |       |        |
| 31    | WAR15      | 26        | 1B | 113.49        | LG.1B.143 | 1229218 | EGA Gregory | -0.056           | 0.492       | 0.31  |              |       |        |
| 32    | WAR15      | 26        | 1B | 113.49        | LG.1B.143 | 1229218 | EGA Wylie   | -0.094           | 0.487       | 0.31  |              |       |        |
| 33    | WAR15      | 26        | 1B | 113.49        | LG.1B.143 | 1229218 | FAC10.16    | 0.005            | 0.499       | 0.3   |              |       |        |
| 34    | WAR15      | 26        | 1B | 113.49        | LG.1B.143 | 1229218 | Mace        | -2.795           | 0.039       | 1.41  |              |       |        |
| 35    | WAR15      | 26        | 1B | 113.49        | LG.1B.143 | 1229218 | UQ114       | 0.032            | 0.496       | 0.3   |              |       |        |
| 36    | WAR15      | 26        | 1B | 113.49        | LG.1B.143 | 1229218 | SB062       | 2.93             | 0.081       | 1.09  |              |       |        |
| 37    | WAR15      | 26        | 1B | 113.49        | LG.1B.143 | 1229218 | Scout       | -2.966           | 0.1         | 1     |              |       |        |
| 38    | WAR15      | 26        | 1B | 113.49        | LG.1B.143 | 1229218 | SeriM82     | 0.473            | 0.413       | 0.38  |              |       |        |
| 39    | WAR15      | 26        | 1B | 113.49        | LG.1B.143 | 1229218 | Suntop      | 3.189            | 0.075       | 1.12  |              |       |        |
| 40    | WAR15      | 26        | 1B | 113.49        | LG.1B.143 | 1229218 | Westonia    | -0.153           | 0.474       | 0.32  |              |       |        |
| 41    | WAR15      | 26        | 1B | 113.49        | LG.1B.143 | 1229218 | ZWB10.37    | -0.037           | 0.495       | 0.31  |              |       |        |
| 42    | WAR15      | 26        | 1B | 113.49        | LG.1B.143 | 1229218 | ZWW10.50    | -0.556           | 0.402       | 0.4   |              |       |        |
| 43    | WAR15      | 1         | 1D | 25.49         | LG.1D.11  | 1099647 | Dharwah dry | -1.966           | 0.201       | 0.7   | 0.015        | 2.3   | 1.82   |
| 44    | WAR15      | 1         | 1D | 25.49         | LG.1D.11  | 1099647 | Drysdale    | -1.551           | 0.263       | 0.58  |              |       |        |
| 45    | WAR15      | 1         | 1D | 25.49         | LG.1D.11  | 1099647 | EGA Gregory | -0.081           | 0.491       | 0.31  |              |       |        |
| 46    | WAR15      | 1         | 1D | 25.49         | LG.1D.11  | 1099647 | EGA Wylie   | -0.136           | 0.484       | 0.31  |              |       |        |
| 47    | WAR15      | 1         | 1D | 25.49         | LG.1D.11  | 1099647 | FAC10.16    | 0.008            | 0.499       | 0.3   |              |       |        |
| 48    | WAR15      | 1         | 1D | 25.49         | LG.1D.11  | 1099647 | Mace        | -4.903           | 0.002       | 2.82  |              |       |        |
| 49    | WAR15      | 1         | 1D | 25.49         | LG.1D.11  | 1099647 | UQ114       | 0.047            | 0.495       | 0.31  |              |       |        |
| 50    | WAR15      | 1         | 1D | 25.49         | LG.1D.11  | 1099647 | SB062       | 1.05             | 0.329       | 0.48  |              |       |        |
| 51    | WAR15      | 1         | 1D | 25.49         | LG.1D.11  | 1099647 | Scout       | 0.58             | 0.433       | 0.36  |              |       |        |
| 52    | WAR15      | 1         | 1D | 25.49         | LG.1D.11  | 1099647 | SeriM82     | 3.138            | 0.101       | 1     |              |       |        |
| 53    | WAR15      | 1         | 1D | 25.49         | LG.1D.11  | 1099647 | Suntop      | 0.11             | 0.487       | 0.31  |              |       |        |
| 54    | WAR15      | 1         | 1D | 25.49         | LG.1D.11  | 1099647 | Westonia    | 1.109            | 0.333       | 0.48  |              |       |        |
| 55    | WAR15      | 1         | 1D | 25.49         | LG.1D.11  | 1099647 | ZWB10.37    | -0.054           | 0.494       | 0.31  |              |       |        |
| 56    | WAR15      | 1         | 1D | 25.49         | LG.1D.11  | 1099647 | ZWW10.50    | 2.649            | 0.149       | 0.83  |              |       |        |
| 57    | WAR15      | 19        | 1D | 58.66         | LG.1D.14  | 3064835 | Dharwah dry | 0.443            | 0.453       | 0.34  | 0.302        | 4.2   | 0.52   |
| 58    | WAR15      | 19        | 1D | 58.66         | LG.1D.14  | 3064835 | Drysdale    | 2.047            | 0.166       | 0.78  |              |       |        |
| 59    | WAR15      | 19        | 1D | 58.66         | LG.1D.14  | 3064835 | EGA Gregory | -0.098           | 0.49        | 0.31  |              |       |        |
| 60    | WAR15      | 19        | 1D | 58.66         | LG.1D.14  | 3064835 | EGA Wylie   | -0.165           | 0.483       | 0.32  |              |       |        |
| 61    | WAR15      | 19        | 1D | 58.66         | LG.1D.14  | 3064835 | FAC10.16    | 0.009            | 0.499       | 0.3   |              |       |        |
| 62    | WAR15      | 19        | 1D | 58.66         | LG.1D.14  | 3064835 | Mace        | 0.124            | 0.477       | 0.32  |              |       |        |
| 63    | WAR15      | 19        | 1D | 58.66         | LG.1D.14  | 3064835 | UQ114       | 0.057            | 0.494       | 0.31  |              |       |        |
| 64    | WAR15      | 19        | 1D | 58.66         | LG.1D.14  | 3064835 | SB062       | 0.65             | 0.432       | 0.36  |              |       |        |
| 65    | WAR15      | 19        | 1D | 58.66         | LG.1D.14  | 3064835 | Scout       | 3.572            | 0.088       | 1.06  |              |       |        |
| 66    | WAR15      | 19        | 1D | 58.66         | LG.1D.14  | 3064835 | SeriM82     | -0.654           | 0.431       | 0.37  |              |       |        |
| 67    | WAR15      | 19        | 1D | 58.66         | LG.1D.14  | 3064835 | Suntop      | -5.671           | 0.013       | 1.87  |              |       |        |
| 68    | WAR15      | 19        | 1D | 58.66         | LG.1D.14  | 3064835 | Westonia    | -1.865           | 0.249       | 0.6   |              |       |        |
| 69    | WAR15      | 19        | 1D | 58.66         | LG.1D.14  | 3064835 | ZWB10.37    | -0.065           | 0.493       | 0.31  |              |       |        |

| Order | Experiment | Iteration | LG | Distance (cm) | Marker    | CloneID | Founder     | Founder Specific |             |       | Overall      |       |        |
|-------|------------|-----------|----|---------------|-----------|---------|-------------|------------------|-------------|-------|--------------|-------|--------|
|       |            |           |    |               |           |         |             | Size             | Probability | Score | Probability2 | % var | Score2 |
| 70    | WAR15      | 19        | 1D | 58.66         | LG.1D.14  | 3064835 | ZWW10.50    | 1.616            | 0.282       | 0.55  |              |       |        |
| 71    | WAR15      | 14        | 1D | 139.53        | LG.1D.79  | 1066774 | Dharwah dry | 0.615            | 0.341       | 0.47  | 0.013        | 1.8   | 1.9    |
| 72    | WAR15      | 14        | 1D | 139.53        | LG.1D.79  | 1066774 | Drysdale    | -3.058           | 0.024       | 1.62  |              |       |        |
| 73    | WAR15      | 14        | 1D | 139.53        | LG.1D.79  | 1066774 | EGA Gregory | -0.045           | 0.493       | 0.31  |              |       |        |
| 74    | WAR15      | 14        | 1D | 139.53        | LG.1D.79  | 1066774 | EGA Wylie   | -1.741           | 0.21        | 0.68  |              |       |        |
| 75    | WAR15      | 14        | 1D | 139.53        | LG.1D.79  | 1066774 | FAC10.16    | 0.004            | 0.499       | 0.3   |              |       |        |
| 76    | WAR15      | 14        | 1D | 139.53        | LG.1D.79  | 1066774 | Mace        | 3.052            | 0.018       | 1.74  |              |       |        |
| 77    | WAR15      | 14        | 1D | 139.53        | LG.1D.79  | 1066774 | UQ114       | 0.026            | 0.496       | 0.3   |              |       |        |
| 78    | WAR15      | 14        | 1D | 139.53        | LG.1D.79  | 1066774 | SB062       | -2.552           | 0.047       | 1.33  |              |       |        |
| 79    | WAR15      | 14        | 1D | 139.53        | LG.1D.79  | 1066774 | Scout       | -1.055           | 0.227       | 0.64  |              |       |        |
| 80    | WAR15      | 14        | 1D | 139.53        | LG.1D.79  | 1066774 | SeriM82     | 0.522            | 0.363       | 0.44  |              |       |        |
| 81    | WAR15      | 14        | 1D | 139.53        | LG.1D.79  | 1066774 | Suntop      | 2.025            | 0.057       | 1.25  |              |       |        |
| 82    | WAR15      | 14        | 1D | 139.53        | LG.1D.79  | 1066774 | Westonia    | -0.066           | 0.49        | 0.31  |              |       |        |
| 83    | WAR15      | 14        | 1D | 139.53        | LG.1D.79  | 1066774 | ZWB10.37    | 2.148            | 0.148       | 0.83  |              |       |        |
| 84    | WAR15      | 14        | 1D | 139.53        | LG.1D.79  | 1066774 | ZWW10.50    | 0.123            | 0.481       | 0.32  |              |       |        |
| 85    | WAR15      | 22        | 2A | 75.64         | LG.2A.128 | 2293684 | Dharwah dry | -0.22            | 0.432       | 0.36  | 0.24         | 0.7   | 0.62   |
| 86    | WAR15      | 22        | 2A | 75.64         | LG.2A.128 | 2293684 | Drysdale    | 1.722            | 0.088       | 1.06  |              |       |        |
| 87    | WAR15      | 22        | 2A | 75.64         | LG.2A.128 | 2293684 | EGA Gregory | -0.409           | 0.39        | 0.41  |              |       |        |
| 88    | WAR15      | 22        | 2A | 75.64         | LG.2A.128 | 2293684 | EGA Wylie   | -0.394           | 0.396       | 0.4   |              |       |        |
| 89    | WAR15      | 22        | 2A | 75.64         | LG.2A.128 | 2293684 | FAC10.16    | -0.51            | 0.363       | 0.44  |              |       |        |
| 90    | WAR15      | 22        | 2A | 75.64         | LG.2A.128 | 2293684 | Mace        | -1.816           | 0.04        | 1.4   |              |       |        |
| 91    | WAR15      | 22        | 2A | 75.64         | LG.2A.128 | 2293684 | UQ114       | -0.618           | 0.335       | 0.47  |              |       |        |
| 92    | WAR15      | 22        | 2A | 75.64         | LG.2A.128 | 2293684 | SB062       | 1.104            | 0.189       | 0.72  |              |       |        |
| 93    | WAR15      | 22        | 2A | 75.64         | LG.2A.128 | 2293684 | Scout       | 0.138            | 0.468       | 0.33  |              |       |        |
| 94    | WAR15      | 22        | 2A | 75.64         | LG.2A.128 | 2293684 | SeriM82     | 1.811            | 0.08        | 1.1   |              |       |        |
| 95    | WAR15      | 22        | 2A | 75.64         | LG.2A.128 | 2293684 | Suntop      | -1.394           | 0.06        | 1.22  |              |       |        |
| 96    | WAR15      | 22        | 2A | 75.64         | LG.2A.128 | 2293684 | Westonia    | 0.041            | 0.489       | 0.31  |              |       |        |
| 97    | WAR15      | 22        | 2A | 75.64         | LG.2A.128 | 2293684 | ZWB10.37    | -0.226           | 0.439       | 0.36  |              |       |        |
| 98    | WAR15      | 22        | 2A | 75.64         | LG.2A.128 | 2293684 | ZWW10.50    | 0.771            | 0.305       | 0.52  |              |       |        |
| 113   | WAR15      | 18        | 2B | 62.53         | LG.2B.92  | 1239537 | Dharwah dry | 1.355            | 0.414       | 0.38  | 0.006        | 13.4  | 2.23   |
| 114   | WAR15      | 18        | 2B | 62.53         | LG.2B.92  | 1239537 | Drysdale    | 2.072            | 0.277       | 0.56  |              |       |        |
| 115   | WAR15      | 18        | 2B | 62.53         | LG.2B.92  | 1239537 | EGA Gregory | -0.301           | 0.481       | 0.32  |              |       |        |
| 116   | WAR15      | 18        | 2B | 62.53         | LG.2B.92  | 1239537 | EGA Wylie   | -0.505           | 0.469       | 0.33  |              |       |        |
| 117   | WAR15      | 18        | 2B | 62.53         | LG.2B.92  | 1239537 | FAC10.16    | 0.029            | 0.498       | 0.3   |              |       |        |
| 118   | WAR15      | 18        | 2B | 62.53         | LG.2B.92  | 1239537 | Mace        | -1.345           | 0.367       | 0.44  |              |       |        |
| 119   | WAR15      | 18        | 2B | 62.53         | LG.2B.92  | 1239537 | UQ114       | 0.173            | 0.489       | 0.31  |              |       |        |
| 120   | WAR15      | 18        | 2B | 62.53         | LG.2B.92  | 1239537 | SB062       | 1.991            | 0.375       | 0.43  |              |       |        |
| 121   | WAR15      | 18        | 2B | 62.53         | LG.2B.92  | 1239537 | Scout       | -9.84            | 0.006       | 2.21  |              |       |        |
| 122   | WAR15      | 18        | 2B | 62.53         | LG.2B.92  | 1239537 | SeriM82     | -2.002           | 0.374       | 0.43  |              |       |        |
| 123   | WAR15      | 18        | 2B | 62.53         | LG.2B.92  | 1239537 | Suntop      | 8.189            | 0.016       | 1.79  |              |       |        |
| 124   | WAR15      | 18        | 2B | 62.53         | LG.2B.92  | 1239537 | Westonia    | -0.437           | 0.472       | 0.33  |              |       |        |
| 125   | WAR15      | 18        | 2B | 62.53         | LG.2B.92  | 1239537 | ZWB10.37    | -0.2             | 0.488       | 0.31  |              |       |        |
| 126   | WAR15      | 18        | 2B | 62.53         | LG.2B.92  | 1239537 | ZWW10.50    | 0.821            | 0.448       | 0.35  |              |       |        |
| 155   | WAR15      | 20        | 3A | 14.42         | LG.3A.20  | 1056945 | Dharwah dry | 0.412            | 0.455       | 0.34  | 0.594        | 1.7   | 0.23   |
| 156   | WAR15      | 20        | 3A | 14.42         | LG.3A.20  | 1056945 | Drysdale    | -0.281           | 0.469       | 0.33  |              |       |        |
| 157   | WAR15      | 20        | 3A | 14.42         | LG.3A.20  | 1056945 | EGA Gregory | -0.091           | 0.49        | 0.31  |              |       |        |
| 158   | WAR15      | 20        | 3A | 14.42         | LG.3A.20  | 1056945 | EGA Wylie   | -0.153           | 0.483       | 0.32  |              |       |        |
| 159   | WAR15      | 20        | 3A | 14.42         | LG.3A.20  | 1056945 | FAC10.16    | 0.009            | 0.499       | 0.3   |              |       |        |
| 160   | WAR15      | 20        | 3A | 14.42         | LG.3A.20  | 1056945 | Mace        | -0.57            | 0.413       | 0.38  |              |       |        |
| 161   | WAR15      | 20        | 3A | 14.42         | LG.3A.20  | 1056945 | UQ114       | 0.053            | 0.494       | 0.31  |              |       |        |
| 162   | WAR15      | 20        | 3A | 14.42         | LG.3A.20  | 1056945 | SB062       | 0.605            | 0.434       | 0.36  |              |       |        |
| 163   | WAR15      | 20        | 3A | 14.42         | LG.3A.20  | 1056945 | Scout       | -0.962           | 0.376       | 0.42  |              |       |        |
| 164   | WAR15      | 20        | 3A | 14.42         | LG.3A.20  | 1056945 | SeriM82     | -4.599           | 0.017       | 1.77  |              |       |        |
| 165   | WAR15      | 20        | 3A | 14.42         | LG.3A.20  | 1056945 | Suntop      | 2.668            | 0.147       | 0.83  |              |       |        |
| 166   | WAR15      | 20        | 3A | 14.42         | LG.3A.20  | 1056945 | Westonia    | -0.133           | 0.486       | 0.31  |              |       |        |
| 167   | WAR15      | 20        | 3A | 14.42         | LG.3A.20  | 1056945 | ZWB10.37    | 2.796            | 0.177       | 0.75  |              |       |        |
| 168   | WAR15      | 20        | 3A | 14.42         | LG.3A.20  | 1056945 | ZWW10.50    | 0.249            | 0.473       | 0.33  |              |       |        |
| 183   | WAR15      | 10        | 3B | 55.13         | LG.3B.103 | 1250327 | Dharwah dry | 0.655            | 0.443       | 0.35  | 0.261        | 3.6   | 0.58   |
| 184   | WAR15      | 10        | 3B | 55.13         | LG.3B.103 | 1250327 | Drysdale    | 4.328            | 0.05        | 1.3   |              |       |        |
| 185   | WAR15      | 10        | 3B | 55.13         | LG.3B.103 | 1250327 | EGA Gregory | -0.145           | 0.487       | 0.31  |              |       |        |
| 186   | WAR15      | 10        | 3B | 55.13         | LG.3B.103 | 1250327 | EGA Wylie   | -0.244           | 0.479       | 0.32  |              |       |        |
| 187   | WAR15      | 10        | 3B | 55.13         | LG.3B.103 | 1250327 | FAC10.16    | 0.014            | 0.499       | 0.3   |              |       |        |
| 188   | WAR15      | 10        | 3B | 55.13         | LG.3B.103 | 1250327 | Mace        | 1.359            | 0.334       | 0.48  |              |       |        |
| 189   | WAR15      | 10        | 3B | 55.13         | LG.3B.103 | 1250327 | UQ114       | 0.084            | 0.493       | 0.31  |              |       |        |
| 190   | WAR15      | 10        | 3B | 55.13         | LG.3B.103 | 1250327 | SB062       | 0.962            | 0.416       | 0.38  |              |       |        |
| 191   | WAR15      | 10        | 3B | 55.13         | LG.3B.103 | 1250327 | Scout       | -6.43            | 0.024       | 1.62  |              |       |        |
| 192   | WAR15      | 10        | 3B | 55.13         | LG.3B.103 | 1250327 | SeriM82     | -0.968           | 0.415       | 0.38  |              |       |        |
| 193   | WAR15      | 10        | 3B | 55.13         | LG.3B.103 | 1250327 | Suntop      | 0.297            | 0.461       | 0.34  |              |       |        |
| 194   | WAR15      | 10        | 3B | 55.13         | LG.3B.103 | 1250327 | Westonia    | -0.211           | 0.482       | 0.32  |              |       |        |
| 195   | WAR15      | 10        | 3B | 55.13         | LG.3B.103 | 1250327 | ZWB10.37    | -0.097           | 0.492       | 0.31  |              |       |        |
| 196   | WAR15      | 10        | 3B | 55.13         | LG.3B.103 | 1250327 | ZWW10.50    | 0.397            | 0.465       | 0.33  |              |       |        |
| 211   | WAR15      | 15        | 4B | 33.74         | LG.4B.27  | 2262825 | Dharwah dry | -1.318           | 0.267       | 0.57  | 0.488        | 1.2   | 0.31   |
| 212   | WAR15      | 15        | 4B | 33.74         | LG.4B.27  | 2262825 | Drysdale    | 0.797            | 0.344       | 0.46  |              |       |        |
| 213   | WAR15      | 15        | 4B | 33.74         | LG.4B.27  | 2262825 | EGA Gregory | -0.051           | 0.493       | 0.31  |              |       |        |
| 214   | WAR15      | 15        | 4B | 33.74         | LG.4B.27  | 2262825 | EGA Wylie   | -0.086           | 0.488       | 0.31  |              |       |        |
| 215   | WAR15      | 15        | 4B | 33.74         | LG.4B.27  | 2262825 | FAC10.16    | 0.005            | 0.499       | 0.3   |              |       |        |
| 216   | WAR15      | 15        | 4B | 33.74         | LG.4B.27  | 2262825 | Mace        | 3.2              | 0.025       | 1.6   |              |       |        |
| 217   | WAR15      | 15        | 4B | 33.74         | LG.4B.27  | 2262825 | UQ114       | 0.03             | 0.496       | 0.3   |              |       |        |
| 218   | WAR15      | 15        | 4B | 33.74         | LG.4B.27  | 2262825 | SB062       | -1.61            | 0.219       | 0.66  |              |       |        |
| 219   | WAR15      | 15        | 4B | 33.74         | LG.4B.27  | 2262825 | Scout       | -1.334           | 0.276       | 0.56  |              |       |        |
| 220   | WAR15      | 15        | 4B | 33.74         | LG.4B.27  | 2262825 | SeriM82     | 2.125            | 0.158       | 0.8   |              |       |        |

| Order | Experiment | Iteration | LG | Distance (cm) | Marker    | CloneID | Founder     | Founder Specific |             |       | Overall      |       |        |
|-------|------------|-----------|----|---------------|-----------|---------|-------------|------------------|-------------|-------|--------------|-------|--------|
|       |            |           |    |               |           |         |             | Size             | Probability | Score | Probability2 | % var | Score2 |
| 221   | WAR15      | 15        | 4B | 33.74         | LG.4B.27  | 2262825 | Suntop      | 0.815            | 0.353       | 0.45  |              |       |        |
| 222   | WAR15      | 15        | 4B | 33.74         | LG.4B.27  | 2262825 | Westonia    | -0.074           | 0.489       | 0.31  |              |       |        |
| 223   | WAR15      | 15        | 4B | 33.74         | LG.4B.27  | 2262825 | ZWB10.37    | -0.034           | 0.495       | 0.31  |              |       |        |
| 224   | WAR15      | 15        | 4B | 33.74         | LG.4B.27  | 2262825 | ZWW10.50    | -2.464           | 0.143       | 0.84  |              |       |        |
| 225   | WAR15      | 5         | 4D | 21.72         | LG.4D.9   | 1201923 | Dharwah dry | 6.333            | 0.017       | 1.78  | 0            | 14    | 10.66  |
| 226   | WAR15      | 5         | 4D | 21.72         | LG.4D.9   | 1201923 | Drysdale    | -7.602           | 0.006       | 2.21  |              |       |        |
| 227   | WAR15      | 5         | 4D | 21.72         | LG.4D.9   | 1201923 | EGA Gregory | 0.866            | 0.393       | 0.41  |              |       |        |
| 228   | WAR15      | 5         | 4D | 21.72         | LG.4D.9   | 1201923 | EGA Wylie   | -2.764           | 0.198       | 0.7   |              |       |        |
| 229   | WAR15      | 5         | 4D | 21.72         | LG.4D.9   | 1201923 | FAC10.16    | 0.021            | 0.498       | 0.3   |              |       |        |
| 230   | WAR15      | 5         | 4D | 21.72         | LG.4D.9   | 1201923 | Mace        | -9.553           | 0           | 3.37  |              |       |        |
| 231   | WAR15      | 5         | 4D | 21.72         | LG.4D.9   | 1201923 | UQ114       | 1.487            | 0.317       | 0.5   |              |       |        |
| 232   | WAR15      | 5         | 4D | 21.72         | LG.4D.9   | 1201923 | SB062       | -1.067           | 0.361       | 0.44  |              |       |        |
| 233   | WAR15      | 5         | 4D | 21.72         | LG.4D.9   | 1201923 | Scout       | 7.406            | 0.007       | 2.14  |              |       |        |
| 234   | WAR15      | 5         | 4D | 21.72         | LG.4D.9   | 1201923 | SeriM82     | -0.174           | 0.477       | 0.32  |              |       |        |
| 235   | WAR15      | 5         | 4D | 21.72         | LG.4D.9   | 1201923 | Suntop      | 1.481            | 0.276       | 0.56  |              |       |        |
| 236   | WAR15      | 5         | 4D | 21.72         | LG.4D.9   | 1201923 | Westonia    | -0.321           | 0.477       | 0.32  |              |       |        |
| 237   | WAR15      | 5         | 4D | 21.72         | LG.4D.9   | 1201923 | ZWB10.37    | -0.147           | 0.489       | 0.31  |              |       |        |
| 238   | WAR15      | 5         | 4D | 21.72         | LG.4D.9   | 1201923 | ZWW10.50    | 4.035            | 0.133       | 0.88  |              |       |        |
| 253   | WAR15      | 17        | 6A | 42.36         | LG.6A.64  | 1142355 | Dharwah dry | -1.119           | 0.41        | 0.39  | 0.057        | 12    | 1.25   |
| 254   | WAR15      | 17        | 6A | 42.36         | LG.6A.64  | 1142355 | Drysdale    | -5.683           | 0.103       | 0.99  |              |       |        |
| 255   | WAR15      | 17        | 6A | 42.36         | LG.6A.64  | 1142355 | EGA Gregory | -0.39            | 0.478       | 0.32  |              |       |        |
| 256   | WAR15      | 17        | 6A | 42.36         | LG.6A.64  | 1142355 | EGA Wylie   | -0.656           | 0.464       | 0.33  |              |       |        |
| 257   | WAR15      | 17        | 6A | 42.36         | LG.6A.64  | 1142355 | FAC10.16    | 0.037            | 0.498       | 0.3   |              |       |        |
| 258   | WAR15      | 17        | 6A | 42.36         | LG.6A.64  | 1142355 | Mace        | -6.415           | 0.036       | 1.44  |              |       |        |
| 259   | WAR15      | 17        | 6A | 42.36         | LG.6A.64  | 1142355 | UQ114       | 0.225            | 0.487       | 0.31  |              |       |        |
| 260   | WAR15      | 17        | 6A | 42.36         | LG.6A.64  | 1142355 | SB062       | -1.742           | 0.356       | 0.45  |              |       |        |
| 261   | WAR15      | 17        | 6A | 42.36         | LG.6A.64  | 1142355 | Scout       | 2.796            | 0.346       | 0.46  |              |       |        |
| 262   | WAR15      | 17        | 6A | 42.36         | LG.6A.64  | 1142355 | SeriM82     | 13.032           | 0.004       | 2.38  |              |       |        |
| 263   | WAR15      | 17        | 6A | 42.36         | LG.6A.64  | 1142355 | Suntop      | 0.53             | 0.47        | 0.33  |              |       |        |
| 264   | WAR15      | 17        | 6A | 42.36         | LG.6A.64  | 1142355 | Westonia    | -5.809           | 0.142       | 0.85  |              |       |        |
| 265   | WAR15      | 17        | 6A | 42.36         | LG.6A.64  | 1142355 | ZWB10.37    | -0.26            | 0.486       | 0.31  |              |       |        |
| 266   | WAR15      | 17        | 6A | 42.36         | LG.6A.64  | 1142355 | ZWW10.50    | 5.453            | 0.123       | 0.91  |              |       |        |
| 267   | WAR15      | 13        | 6A | 42.36         | LG.6A.65  | 1208893 | Dharwah dry | -5.314           | 0.125       | 0.9   | 0.144        | 8.6   | 0.84   |
| 268   | WAR15      | 13        | 6A | 42.36         | LG.6A.65  | 1208893 | Drysdale    | 5.303            | 0.102       | 0.99  |              |       |        |
| 269   | WAR15      | 13        | 6A | 42.36         | LG.6A.65  | 1208893 | EGA Gregory | -0.271           | 0.482       | 0.32  |              |       |        |
| 270   | WAR15      | 13        | 6A | 42.36         | LG.6A.65  | 1208893 | EGA Wylie   | -0.455           | 0.47        | 0.33  |              |       |        |
| 271   | WAR15      | 13        | 6A | 42.36         | LG.6A.65  | 1208893 | FAC10.16    | 0.026            | 0.498       | 0.3   |              |       |        |
| 272   | WAR15      | 13        | 6A | 42.36         | LG.6A.65  | 1208893 | Mace        | 7.495            | 0.009       | 2.03  |              |       |        |
| 273   | WAR15      | 13        | 6A | 42.36         | LG.6A.65  | 1208893 | UQ114       | 0.156            | 0.49        | 0.31  |              |       |        |
| 274   | WAR15      | 13        | 6A | 42.36         | LG.6A.65  | 1208893 | SB062       | -7.66            | 0.043       | 1.37  |              |       |        |
| 275   | WAR15      | 13        | 6A | 42.36         | LG.6A.65  | 1208893 | Scout       | 1.941            | 0.374       | 0.43  |              |       |        |
| 276   | WAR15      | 13        | 6A | 42.36         | LG.6A.65  | 1208893 | SeriM82     | -2.109           | 0.323       | 0.49  |              |       |        |
| 277   | WAR15      | 13        | 6A | 42.36         | LG.6A.65  | 1208893 | Suntop      | 0.368            | 0.476       | 0.32  |              |       |        |
| 278   | WAR15      | 13        | 6A | 42.36         | LG.6A.65  | 1208893 | Westonia    | -1.212           | 0.403       | 0.39  |              |       |        |
| 279   | WAR15      | 13        | 6A | 42.36         | LG.6A.65  | 1208893 | ZWB10.37    | -0.181           | 0.488       | 0.31  |              |       |        |
| 280   | WAR15      | 13        | 6A | 42.36         | LG.6A.65  | 1208893 | ZWW10.50    | 1.913            | 0.327       | 0.49  |              |       |        |
| 281   | WAR15      | 12        | 6A | 75.14         | LG.6A.147 | 999810  | Dharwah dry | 4.444            | 0.026       | 1.58  | 0.5          | 1.6   | 0.3    |
| 282   | WAR15      | 12        | 6A | 75.14         | LG.6A.147 | 999810  | Drysdale    | -2.369           | 0.16        | 0.79  |              |       |        |
| 283   | WAR15      | 12        | 6A | 75.14         | LG.6A.147 | 999810  | EGA Gregory | -0.068           | 0.491       | 0.31  |              |       |        |
| 284   | WAR15      | 12        | 6A | 75.14         | LG.6A.147 | 999810  | EGA Wylie   | -0.115           | 0.486       | 0.31  |              |       |        |
| 285   | WAR15      | 12        | 6A | 75.14         | LG.6A.147 | 999810  | FAC10.16    | 0.007            | 0.499       | 0.3   |              |       |        |
| 286   | WAR15      | 12        | 6A | 75.14         | LG.6A.147 | 999810  | Mace        | -2.793           | 0.049       | 1.31  |              |       |        |
| 287   | WAR15      | 12        | 6A | 75.14         | LG.6A.147 | 999810  | UQ114       | 0.04             | 0.495       | 0.31  |              |       |        |
| 288   | WAR15      | 12        | 6A | 75.14         | LG.6A.147 | 999810  | SB062       | 0.13             | 0.478       | 0.32  |              |       |        |
| 289   | WAR15      | 12        | 6A | 75.14         | LG.6A.147 | 999810  | Scout       | 0.49             | 0.439       | 0.36  |              |       |        |
| 290   | WAR15      | 12        | 6A | 75.14         | LG.6A.147 | 999810  | SeriM82     | -0.605           | 0.409       | 0.39  |              |       |        |
| 291   | WAR15      | 12        | 6A | 75.14         | LG.6A.147 | 999810  | Suntop      | 0.093            | 0.488       | 0.31  |              |       |        |
| 292   | WAR15      | 12        | 6A | 75.14         | LG.6A.147 | 999810  | Westonia    | 0.722            | 0.396       | 0.4   |              |       |        |
| 293   | WAR15      | 12        | 6A | 75.14         | LG.6A.147 | 999810  | ZWB10.37    | -0.046           | 0.494       | 0.31  |              |       |        |
| 294   | WAR15      | 12        | 6A | 75.14         | LG.6A.147 | 999810  | ZWW10.50    | 0.072            | 0.489       | 0.31  |              |       |        |
| 295   | WAR15      | 21        | 6A | 79.64         | LG.6A.154 | 1009888 | Dharwah dry | -0.736           | 0.313       | 0.5   | 0.59         | 0.7   | 0.23   |
| 296   | WAR15      | 21        | 6A | 79.64         | LG.6A.154 | 1009888 | Drysdale    | 1.118            | 0.233       | 0.63  |              |       |        |
| 297   | WAR15      | 21        | 6A | 79.64         | LG.6A.154 | 1009888 | EGA Gregory | 0.453            | 0.385       | 0.41  |              |       |        |
| 298   | WAR15      | 21        | 6A | 79.64         | LG.6A.154 | 1009888 | EGA Wylie   | -0.037           | 0.492       | 0.31  |              |       |        |
| 299   | WAR15      | 21        | 6A | 79.64         | LG.6A.154 | 1009888 | FAC10.16    | 1.087            | 0.239       | 0.62  |              |       |        |
| 300   | WAR15      | 21        | 6A | 79.64         | LG.6A.154 | 1009888 | Mace        | -0.19            | 0.459       | 0.34  |              |       |        |
| 301   | WAR15      | 21        | 6A | 79.64         | LG.6A.154 | 1009888 | UQ114       | -1.033           | 0.257       | 0.59  |              |       |        |
| 302   | WAR15      | 21        | 6A | 79.64         | LG.6A.154 | 1009888 | SB062       | 0.656            | 0.33        | 0.48  |              |       |        |
| 303   | WAR15      | 21        | 6A | 79.64         | LG.6A.154 | 1009888 | Scout       | 1.205            | 0.223       | 0.65  |              |       |        |
| 304   | WAR15      | 21        | 6A | 79.64         | LG.6A.154 | 1009888 | SeriM82     | 0.248            | 0.435       | 0.36  |              |       |        |
| 305   | WAR15      | 21        | 6A | 79.64         | LG.6A.154 | 1009888 | Suntop      | -2.297           | 0.013       | 1.89  |              |       |        |
| 306   | WAR15      | 21        | 6A | 79.64         | LG.6A.154 | 1009888 | Westonia    | -0.032           | 0.493       | 0.31  |              |       |        |
| 307   | WAR15      | 21        | 6A | 79.64         | LG.6A.154 | 1009888 | ZWB10.37    | -0.502           | 0.374       | 0.43  |              |       |        |
| 308   | WAR15      | 21        | 6A | 79.64         | LG.6A.154 | 1009888 | ZWW10.50    | 0.061            | 0.487       | 0.31  |              |       |        |
| 337   | WAR15      | 23        | 7B | 83.16         | LG.7B.155 | 1017568 | Dharwah dry | 0.43             | 0.454       | 0.34  | 0.547        | 2.3   | 0.26   |
| 338   | WAR15      | 23        | 7B | 83.16         | LG.7B.155 | 1017568 | Drysdale    | -2.681           | 0.109       | 0.96  |              |       |        |
| 339   | WAR15      | 23        | 7B | 83.16         | LG.7B.155 | 1017568 | EGA Gregory | -0.095           | 0.49        | 0.31  |              |       |        |
| 340   | WAR15      | 23        | 7B | 83.16         | LG.7B.155 | 1017568 | EGA Wylie   | -0.16            | 0.483       | 0.32  |              |       |        |
| 341   | WAR15      | 23        | 7B | 83.16         | LG.7B.155 | 1017568 | FAC10.16    | 0.009            | 0.499       | 0.3   |              |       |        |
| 342   | WAR15      | 23        | 7B | 83.16         | LG.7B.155 | 1017568 | Mace        | -1.814           | 0.242       | 0.62  |              |       |        |
| 343   | WAR15      | 23        | 7B | 83.16         | LG.7B.155 | 1017568 | UQ114       | 0.055            | 0.494       | 0.31  |              |       |        |

| Order | Experiment | Iteration | LG | Distance (cm) | Marker    | CloneID | Founder     | Founder Specific |             |       | Overall      |       |        |
|-------|------------|-----------|----|---------------|-----------|---------|-------------|------------------|-------------|-------|--------------|-------|--------|
|       |            |           |    |               |           |         |             | Size             | Probability | Score | Probability2 | % var | Score2 |
| 344   | WAR15      | 23        | 7B | 83.16         | LG.7B.155 | 1017568 | SB062       | 0.631            | 0.433       | 0.36  |              |       |        |
| 345   | WAR15      | 23        | 7B | 83.16         | LG.7B.155 | 1017568 | Scout       | 5.132            | 0.025       | 1.61  |              |       |        |
| 346   | WAR15      | 23        | 7B | 83.16         | LG.7B.155 | 1017568 | SeriM82     | -0.635           | 0.432       | 0.36  |              |       |        |
| 347   | WAR15      | 23        | 7B | 83.16         | LG.7B.155 | 1017568 | Suntop      | -0.93            | 0.359       | 0.45  |              |       |        |
| 348   | WAR15      | 23        | 7B | 83.16         | LG.7B.155 | 1017568 | Westonia    | -0.138           | 0.485       | 0.31  |              |       |        |
| 349   | WAR15      | 23        | 7B | 83.16         | LG.7B.155 | 1017568 | ZWB10.37    | -0.064           | 0.493       | 0.31  |              |       |        |
| 350   | WAR15      | 23        | 7B | 83.16         | LG.7B.155 | 1017568 | ZWW10.50    | 0.26             | 0.472       | 0.33  |              |       |        |
| 351   | WAR15      | 9         | 7D | 80.81         | LG.7D.38  | 1007981 | Dharwah dry | 0.485            | 0.451       | 0.35  | 0.084        | 3     | 1.07   |
| 352   | WAR15      | 9         | 7D | 80.81         | LG.7D.38  | 1007981 | Drysdale    | 5.188            | 0.008       | 2.09  |              |       |        |
| 353   | WAR15      | 9         | 7D | 80.81         | LG.7D.38  | 1007981 | EGA Gregory | -0.108           | 0.489       | 0.31  |              |       |        |
| 354   | WAR15      | 9         | 7D | 80.81         | LG.7D.38  | 1007981 | EGA Wylie   | -0.181           | 0.482       | 0.32  |              |       |        |
| 355   | WAR15      | 9         | 7D | 80.81         | LG.7D.38  | 1007981 | FAC10.16    | 0.01             | 0.499       | 0.3   |              |       |        |
| 356   | WAR15      | 9         | 7D | 80.81         | LG.7D.38  | 1007981 | Mace        | 2.888            | 0.135       | 0.87  |              |       |        |
| 357   | WAR15      | 9         | 7D | 80.81         | LG.7D.38  | 1007981 | UQ114       | -3.288           | 0.078       | 1.11  |              |       |        |
| 358   | WAR15      | 9         | 7D | 80.81         | LG.7D.38  | 1007981 | SB062       | 0.713            | 0.428       | 0.37  |              |       |        |
| 359   | WAR15      | 9         | 7D | 80.81         | LG.7D.38  | 1007981 | Scout       | -3.213           | 0.084       | 1.08  |              |       |        |
| 360   | WAR15      | 9         | 7D | 80.81         | LG.7D.38  | 1007981 | SeriM82     | -0.717           | 0.428       | 0.37  |              |       |        |
| 361   | WAR15      | 9         | 7D | 80.81         | LG.7D.38  | 1007981 | Suntop      | -1.785           | 0.217       | 0.66  |              |       |        |
| 362   | WAR15      | 9         | 7D | 80.81         | LG.7D.38  | 1007981 | Westonia    | -0.156           | 0.484       | 0.31  |              |       |        |
| 363   | WAR15      | 9         | 7D | 80.81         | LG.7D.38  | 1007981 | ZWB10.37    | -0.13            | 0.487       | 0.31  |              |       |        |
| 364   | WAR15      | 9         | 7D | 80.81         | LG.7D.38  | 1007981 | ZWW10.50    | 0.294            | 0.47        | 0.33  |              |       |        |
| 99    | WAR15      | 4         | 2A | 86.71         | LG.2A.142 | 991712  | Dharwah dry | 0.395            | 0.456       | 0.34  | 0.988        | 0.5   | 0.01   |
| 100   | WAR15      | 4         | 2A | 86.71         | LG.2A.142 | 991712  | Drysdale    | -0.27            | 0.47        | 0.33  |              |       |        |
| 101   | WAR15      | 4         | 2A | 86.71         | LG.2A.142 | 991712  | EGA Gregory | -0.088           | 0.49        | 0.31  |              |       |        |
| 102   | WAR15      | 4         | 2A | 86.71         | LG.2A.142 | 991712  | EGA Wylie   | -0.147           | 0.484       | 0.32  |              |       |        |
| 103   | WAR15      | 4         | 2A | 86.71         | LG.2A.142 | 991712  | FAC10.16    | 0.008            | 0.499       | 0.3   |              |       |        |
| 104   | WAR15      | 4         | 2A | 86.71         | LG.2A.142 | 991712  | Mace        | 2.466            | 0.194       | 0.71  |              |       |        |
| 105   | WAR15      | 4         | 2A | 86.71         | LG.2A.142 | 991712  | UQ114       | 0.051            | 0.494       | 0.31  |              |       |        |
| 106   | WAR15      | 4         | 2A | 86.71         | LG.2A.142 | 991712  | SB062       | 0.581            | 0.436       | 0.36  |              |       |        |
| 107   | WAR15      | 4         | 2A | 86.71         | LG.2A.142 | 991712  | Scout       | 0.628            | 0.431       | 0.37  |              |       |        |
| 108   | WAR15      | 4         | 2A | 86.71         | LG.2A.142 | 991712  | SeriM82     | -0.584           | 0.435       | 0.36  |              |       |        |
| 109   | WAR15      | 4         | 2A | 86.71         | LG.2A.142 | 991712  | Suntop      | 0.119            | 0.487       | 0.31  |              |       |        |
| 110   | WAR15      | 4         | 2A | 86.71         | LG.2A.142 | 991712  | Westonia    | -0.127           | 0.486       | 0.31  |              |       |        |
| 111   | WAR15      | 4         | 2A | 86.71         | LG.2A.142 | 991712  | ZWB10.37    | -0.058           | 0.494       | 0.31  |              |       |        |
| 112   | WAR15      | 4         | 2A | 86.71         | LG.2A.142 | 991712  | ZWW10.50    | -2.974           | 0.149       | 0.83  |              |       |        |
| 127   | WAR15      | 7         | 2B | 75.13         | LG.2B.157 | 1036795 | Dharwah dry | 0.677            | 0.442       | 0.36  | 0.894        | 1.8   | 0.05   |
| 128   | WAR15      | 7         | 2B | 75.13         | LG.2B.157 | 1036795 | Drysdale    | -0.462           | 0.46        | 0.34  |              |       |        |
| 129   | WAR15      | 7         | 2B | 75.13         | LG.2B.157 | 1036795 | EGA Gregory | -0.15            | 0.487       | 0.31  |              |       |        |
| 130   | WAR15      | 7         | 2B | 75.13         | LG.2B.157 | 1036795 | EGA Wylie   | -4.029           | 0.134       | 0.87  |              |       |        |
| 131   | WAR15      | 7         | 2B | 75.13         | LG.2B.157 | 1036795 | FAC10.16    | 0.014            | 0.499       | 0.3   |              |       |        |
| 132   | WAR15      | 7         | 2B | 75.13         | LG.2B.157 | 1036795 | Mace        | -1.28            | 0.39        | 0.41  |              |       |        |
| 133   | WAR15      | 7         | 2B | 75.13         | LG.2B.157 | 1036795 | UQ114       | 0.087            | 0.493       | 0.31  |              |       |        |
| 134   | WAR15      | 7         | 2B | 75.13         | LG.2B.157 | 1036795 | SB062       | 0.995            | 0.415       | 0.38  |              |       |        |
| 135   | WAR15      | 7         | 2B | 75.13         | LG.2B.157 | 1036795 | Scout       | 1.076            | 0.408       | 0.39  |              |       |        |
| 136   | WAR15      | 7         | 2B | 75.13         | LG.2B.157 | 1036795 | SeriM82     | -1.001           | 0.414       | 0.38  |              |       |        |
| 137   | WAR15      | 7         | 2B | 75.13         | LG.2B.157 | 1036795 | Suntop      | 3.981            | 0.135       | 0.87  |              |       |        |
| 138   | WAR15      | 7         | 2B | 75.13         | LG.2B.157 | 1036795 | Westonia    | -0.218           | 0.481       | 0.32  |              |       |        |
| 139   | WAR15      | 7         | 2B | 75.13         | LG.2B.157 | 1036795 | ZWB10.37    | -0.1             | 0.491       | 0.31  |              |       |        |
| 140   | WAR15      | 7         | 2B | 75.13         | LG.2B.157 | 1036795 | ZWW10.50    | 0.41             | 0.464       | 0.33  |              |       |        |
| 141   | WAR15      | 16        | 2B | 81.52         | LG.2B.117 | 1091982 | Dharwah dry | 0.074            | 0.481       | 0.32  | 1            | 0.1   | 0      |
| 142   | WAR15      | 16        | 2B | 81.52         | LG.2B.117 | 1091982 | Drysdale    | 1.342            | 0.141       | 0.85  |              |       |        |
| 143   | WAR15      | 16        | 2B | 81.52         | LG.2B.117 | 1091982 | EGA Gregory | -0.016           | 0.496       | 0.3   |              |       |        |
| 144   | WAR15      | 16        | 2B | 81.52         | LG.2B.117 | 1091982 | EGA Wylie   | -0.028           | 0.493       | 0.31  |              |       |        |
| 145   | WAR15      | 16        | 2B | 81.52         | LG.2B.117 | 1091982 | FAC10.16    | 0.002            | 0.5         | 0.3   |              |       |        |
| 146   | WAR15      | 16        | 2B | 81.52         | LG.2B.117 | 1091982 | Mace        | -0.371           | 0.398       | 0.4   |              |       |        |
| 147   | WAR15      | 16        | 2B | 81.52         | LG.2B.117 | 1091982 | UQ114       | 0.009            | 0.498       | 0.3   |              |       |        |
| 148   | WAR15      | 16        | 2B | 81.52         | LG.2B.117 | 1091982 | SB062       | 0.109            | 0.472       | 0.33  |              |       |        |
| 149   | WAR15      | 16        | 2B | 81.52         | LG.2B.117 | 1091982 | Scout       | -0.617           | 0.335       | 0.48  |              |       |        |
| 150   | WAR15      | 16        | 2B | 81.52         | LG.2B.117 | 1091982 | SeriM82     | -0.109           | 0.472       | 0.33  |              |       |        |
| 151   | WAR15      | 16        | 2B | 81.52         | LG.2B.117 | 1091982 | Suntop      | -0.404           | 0.386       | 0.41  |              |       |        |
| 152   | WAR15      | 16        | 2B | 81.52         | LG.2B.117 | 1091982 | Westonia    | -0.024           | 0.494       | 0.31  |              |       |        |
| 153   | WAR15      | 16        | 2B | 81.52         | LG.2B.117 | 1091982 | ZWB10.37    | -0.011           | 0.497       | 0.3   |              |       |        |
| 154   | WAR15      | 16        | 2B | 81.52         | LG.2B.117 | 1091982 | ZWW10.50    | 0.045            | 0.489       | 0.31  |              |       |        |
| 169   | WAR15      | 11        | 3A | 47.73         | LG.3A.69  | 1096770 | Dharwah dry | 0.154            | 0.473       | 0.33  | 1            | 0.2   | 0      |
| 170   | WAR15      | 11        | 3A | 47.73         | LG.3A.69  | 1096770 | Drysdale    | -0.105           | 0.481       | 0.32  |              |       |        |
| 171   | WAR15      | 11        | 3A | 47.73         | LG.3A.69  | 1096770 | EGA Gregory | -0.034           | 0.494       | 0.31  |              |       |        |
| 172   | WAR15      | 11        | 3A | 47.73         | LG.3A.69  | 1096770 | EGA Wylie   | -1.327           | 0.248       | 0.61  |              |       |        |
| 173   | WAR15      | 11        | 3A | 47.73         | LG.3A.69  | 1096770 | FAC10.16    | 0.003            | 0.499       | 0.3   |              |       |        |
| 174   | WAR15      | 11        | 3A | 47.73         | LG.3A.69  | 1096770 | Mace        | -0.292           | 0.449       | 0.35  |              |       |        |
| 175   | WAR15      | 11        | 3A | 47.73         | LG.3A.69  | 1096770 | UQ114       | 0.02             | 0.497       | 0.3   |              |       |        |
| 176   | WAR15      | 11        | 3A | 47.73         | LG.3A.69  | 1096770 | SB062       | 0.227            | 0.46        | 0.34  |              |       |        |
| 177   | WAR15      | 11        | 3A | 47.73         | LG.3A.69  | 1096770 | Scout       | 0.245            | 0.457       | 0.34  |              |       |        |
| 178   | WAR15      | 11        | 3A | 47.73         | LG.3A.69  | 1096770 | SeriM82     | -0.228           | 0.46        | 0.34  |              |       |        |
| 179   | WAR15      | 11        | 3A | 47.73         | LG.3A.69  | 1096770 | Suntop      | 1.316            | 0.25        | 0.6   |              |       |        |
| 180   | WAR15      | 11        | 3A | 47.73         | LG.3A.69  | 1096770 | Westonia    | -0.05            | 0.491       | 0.31  |              |       |        |
| 181   | WAR15      | 11        | 3A | 47.73         | LG.3A.69  | 1096770 | ZWB10.37    | -0.023           | 0.496       | 0.3   |              |       |        |
| 182   | WAR15      | 11        | 3A | 47.73         | LG.3A.69  | 1096770 | ZWW10.50    | 0.093            | 0.484       | 0.32  |              |       |        |
| 197   | WAR15      | 25        | 3B | 111.3         | LG.3B.164 | 1167676 | Dharwah dry | 2.396            | 0.054       | 1.27  | 0.933        | 0.4   | 0.03   |
| 198   | WAR15      | 25        | 3B | 111.3         | LG.3B.164 | 1167676 | Drysdale    | -0.105           | 0.481       | 0.32  |              |       |        |
| 199   | WAR15      | 25        | 3B | 111.3         | LG.3B.164 | 1167676 | EGA Gregory | -0.034           | 0.494       | 0.31  |              |       |        |
| 200   | WAR15      | 25        | 3B | 111.3         | LG.3B.164 | 1167676 | EGA Wylie   | -0.057           | 0.49        | 0.31  |              |       |        |

| Order | Experiment | Iteration | LG | Distance (cm) | Marker    | CloneID | Founder     | Founder Specific |             |       | Overall      |       |        |
|-------|------------|-----------|----|---------------|-----------|---------|-------------|------------------|-------------|-------|--------------|-------|--------|
|       |            |           |    |               |           |         |             | Size             | Probability | Score | Probability2 | % var | Score2 |
| 201   | WAR15      | 25        | 3B | 111.3         | LG.3B.164 | 1167676 | FAC10.16    | 0.003            | 0.499       | 0.3   |              |       |        |
| 202   | WAR15      | 25        | 3B | 111.3         | LG.3B.164 | 1167676 | Mace        | -1.632           | 0.193       | 0.71  |              |       |        |
| 203   | WAR15      | 25        | 3B | 111.3         | LG.3B.164 | 1167676 | UQ114       | 0.02             | 0.497       | 0.3   |              |       |        |
| 204   | WAR15      | 25        | 3B | 111.3         | LG.3B.164 | 1167676 | SB062       | 0.226            | 0.46        | 0.34  |              |       |        |
| 205   | WAR15      | 25        | 3B | 111.3         | LG.3B.164 | 1167676 | Scout       | 0.282            | 0.437       | 0.36  |              |       |        |
| 206   | WAR15      | 25        | 3B | 111.3         | LG.3B.164 | 1167676 | SeriM82     | -0.227           | 0.46        | 0.34  |              |       |        |
| 207   | WAR15      | 25        | 3B | 111.3         | LG.3B.164 | 1167676 | Suntop      | -0.893           | 0.309       | 0.51  |              |       |        |
| 208   | WAR15      | 25        | 3B | 111.3         | LG.3B.164 | 1167676 | Westonia    | -0.05            | 0.491       | 0.31  |              |       |        |
| 209   | WAR15      | 25        | 3B | 111.3         | LG.3B.164 | 1167676 | ZWB10.37    | -0.023           | 0.496       | 0.3   |              |       |        |
| 210   | WAR15      | 25        | 3B | 111.3         | LG.3B.164 | 1167676 | ZWW10.50    | 0.093            | 0.484       | 0.32  |              |       |        |
| 239   | WAR15      | 8         | 5A | 67.87         | LG.5A.143 | 3022342 | Dharwah dry | -0.072           | 0.48        | 0.32  | 0.972        | 0.2   | 0.01   |
| 240   | WAR15      | 8         | 5A | 67.87         | LG.5A.143 | 3022342 | Drysdale    | -0.056           | 0.484       | 0.31  |              |       |        |
| 241   | WAR15      | 8         | 5A | 67.87         | LG.5A.143 | 3022342 | EGA Gregory | -0.017           | 0.496       | 0.3   |              |       |        |
| 242   | WAR15      | 8         | 5A | 67.87         | LG.5A.143 | 3022342 | EGA Wylie   | -0.029           | 0.493       | 0.31  |              |       |        |
| 243   | WAR15      | 8         | 5A | 67.87         | LG.5A.143 | 3022342 | FAC10.16    | 0.002            | 0.5         | 0.3   |              |       |        |
| 244   | WAR15      | 8         | 5A | 67.87         | LG.5A.143 | 3022342 | Mace        | -1.636           | 0.057       | 1.24  |              |       |        |
| 245   | WAR15      | 8         | 5A | 67.87         | LG.5A.143 | 3022342 | UQ114       | 0.01             | 0.498       | 0.3   |              |       |        |
| 246   | WAR15      | 8         | 5A | 67.87         | LG.5A.143 | 3022342 | SB062       | 1.28             | 0.18        | 0.74  |              |       |        |
| 247   | WAR15      | 8         | 5A | 67.87         | LG.5A.143 | 3022342 | Scout       | 0.125            | 0.469       | 0.33  |              |       |        |
| 248   | WAR15      | 8         | 5A | 67.87         | LG.5A.143 | 3022342 | SeriM82     | 0.737            | 0.3         | 0.52  |              |       |        |
| 249   | WAR15      | 8         | 5A | 67.87         | LG.5A.143 | 3022342 | Suntop      | 0.024            | 0.494       | 0.31  |              |       |        |
| 250   | WAR15      | 8         | 5A | 67.87         | LG.5A.143 | 3022342 | Westonia    | -0.658           | 0.325       | 0.49  |              |       |        |
| 251   | WAR15      | 8         | 5A | 67.87         | LG.5A.143 | 3022342 | ZWB10.37    | -0.012           | 0.497       | 0.3   |              |       |        |
| 252   | WAR15      | 8         | 5A | 67.87         | LG.5A.143 | 3022342 | ZWW10.50    | 0.303            | 0.419       | 0.38  |              |       |        |
| 309   | WAR15      | 3         | 7A | 88.85         | LG.7A.110 | 1180442 | Dharwah dry | 0.168            | 0.472       | 0.33  | 0.903        | 0.6   | 0.04   |
| 310   | WAR15      | 3         | 7A | 88.85         | LG.7A.110 | 1180442 | Drysdale    | 2.437            | 0.059       | 1.23  |              |       |        |
| 311   | WAR15      | 3         | 7A | 88.85         | LG.7A.110 | 1180442 | EGA Gregory | -0.037           | 0.494       | 0.31  |              |       |        |
| 312   | WAR15      | 3         | 7A | 88.85         | LG.7A.110 | 1180442 | EGA Wylie   | -0.063           | 0.489       | 0.31  |              |       |        |
| 313   | WAR15      | 3         | 7A | 88.85         | LG.7A.110 | 1180442 | FAC10.16    | 0.004            | 0.499       | 0.3   |              |       |        |
| 314   | WAR15      | 3         | 7A | 88.85         | LG.7A.110 | 1180442 | Mace        | -0.191           | 0.459       | 0.34  |              |       |        |
| 315   | WAR15      | 3         | 7A | 88.85         | LG.7A.110 | 1180442 | UQ114       | 0.022            | 0.496       | 0.3   |              |       |        |
| 316   | WAR15      | 3         | 7A | 88.85         | LG.7A.110 | 1180442 | SB062       | 0.247            | 0.458       | 0.34  |              |       |        |
| 317   | WAR15      | 3         | 7A | 88.85         | LG.7A.110 | 1180442 | Scout       | -0.341           | 0.431       | 0.37  |              |       |        |
| 318   | WAR15      | 3         | 7A | 88.85         | LG.7A.110 | 1180442 | SeriM82     | -0.248           | 0.458       | 0.34  |              |       |        |
| 319   | WAR15      | 3         | 7A | 88.85         | LG.7A.110 | 1180442 | Suntop      | -2.02            | 0.138       | 0.86  |              |       |        |
| 320   | WAR15      | 3         | 7A | 88.85         | LG.7A.110 | 1180442 | Westonia    | -0.054           | 0.491       | 0.31  |              |       |        |
| 321   | WAR15      | 3         | 7A | 88.85         | LG.7A.110 | 1180442 | ZWB10.37    | -0.025           | 0.496       | 0.3   |              |       |        |
| 322   | WAR15      | 3         | 7A | 88.85         | LG.7A.110 | 1180442 | ZWW10.50    | 0.102            | 0.483       | 0.32  |              |       |        |
| 323   | WAR15      | 6         | 7A | 89.5          | LG.7A.127 | 1204762 | Dharwah dry | 0.682            | 0.441       | 0.36  | 0.783        | 1.1   | 0.11   |
| 324   | WAR15      | 6         | 7A | 89.5          | LG.7A.127 | 1204762 | Drysdale    | -0.465           | 0.459       | 0.34  |              |       |        |
| 325   | WAR15      | 6         | 7A | 89.5          | LG.7A.127 | 1204762 | EGA Gregory | -0.151           | 0.487       | 0.31  |              |       |        |
| 326   | WAR15      | 6         | 7A | 89.5          | LG.7A.127 | 1204762 | EGA Wylie   | -0.254           | 0.478       | 0.32  |              |       |        |
| 327   | WAR15      | 6         | 7A | 89.5          | LG.7A.127 | 1204762 | FAC10.16    | 0.014            | 0.499       | 0.3   |              |       |        |
| 328   | WAR15      | 6         | 7A | 89.5          | LG.7A.127 | 1204762 | Mace        | 3.684            | 0.149       | 0.83  |              |       |        |
| 329   | WAR15      | 6         | 7A | 89.5          | LG.7A.127 | 1204762 | UQ114       | 0.087            | 0.493       | 0.31  |              |       |        |
| 330   | WAR15      | 6         | 7A | 89.5          | LG.7A.127 | 1204762 | SB062       | 1.002            | 0.414       | 0.38  |              |       |        |
| 331   | WAR15      | 6         | 7A | 89.5          | LG.7A.127 | 1204762 | Scout       | 1.083            | 0.408       | 0.39  |              |       |        |
| 332   | WAR15      | 6         | 7A | 89.5          | LG.7A.127 | 1204762 | SeriM82     | -1.008           | 0.413       | 0.38  |              |       |        |
| 333   | WAR15      | 6         | 7A | 89.5          | LG.7A.127 | 1204762 | Suntop      | 0.205            | 0.482       | 0.32  |              |       |        |
| 334   | WAR15      | 6         | 7A | 89.5          | LG.7A.127 | 1204762 | Westonia    | -0.22            | 0.481       | 0.32  |              |       |        |
| 335   | WAR15      | 6         | 7A | 89.5          | LG.7A.127 | 1204762 | ZWB10.37    | -0.101           | 0.491       | 0.31  |              |       |        |
| 336   | WAR15      | 6         | 7A | 89.5          | LG.7A.127 | 1204762 | ZWW10.50    | -4.56            | 0.101       | 0.99  |              |       |        |
| 1     | WAR16      | 2         | 2B | 63.52         | LG.2B.98  | 4989040 | Dharwah dry | 1.515            | 0.358       | 0.45  | 0.069        | 11.1  | 1.16   |
| 2     | WAR16      | 2         | 2B | 63.52         | LG.2B.98  | 4989040 | Drysdale    | -1.571           | 0.274       | 0.56  |              |       |        |
| 3     | WAR16      | 2         | 2B | 63.52         | LG.2B.98  | 4989040 | EGA Gregory | -0.226           | 0.479       | 0.32  |              |       |        |
| 4     | WAR16      | 2         | 2B | 63.52         | LG.2B.98  | 4989040 | EGA Wylie   | -1.943           | 0.276       | 0.56  |              |       |        |
| 5     | WAR16      | 2         | 2B | 63.52         | LG.2B.98  | 4989040 | FAC10.16    | 0.102            | 0.491       | 0.31  |              |       |        |
| 6     | WAR16      | 2         | 2B | 63.52         | LG.2B.98  | 4989040 | Mace        | -2.723           | 0.175       | 0.76  |              |       |        |
| 7     | WAR16      | 2         | 2B | 63.52         | LG.2B.98  | 4989040 | UQ114       | -0.62            | 0.442       | 0.35  |              |       |        |
| 8     | WAR16      | 2         | 2B | 63.52         | LG.2B.98  | 4989040 | SB062       | 0.345            | 0.467       | 0.33  |              |       |        |
| 9     | WAR16      | 2         | 2B | 63.52         | LG.2B.98  | 4989040 | SeriM82     | -0.988           | 0.407       | 0.39  |              |       |        |
| 10    | WAR16      | 2         | 2B | 63.52         | LG.2B.98  | 4989040 | Suntop      | 6.796            | 0.005       | 2.28  |              |       |        |
| 11    | WAR16      | 2         | 2B | 63.52         | LG.2B.98  | 4989040 | Westonia    | -0.438           | 0.459       | 0.34  |              |       |        |
| 12    | WAR16      | 2         | 2B | 63.52         | LG.2B.98  | 4989040 | ZWB10.37    | -0.25            | 0.477       | 0.32  |              |       |        |
| 13    | WAR16      | 2         | 2B | 63.52         | LG.2B.98  | 4989040 | ZWW10.50    | 0                | 0.5         | 0.3   |              |       |        |
| 14    | WAR16      | 5         | 2B | 107.01        | LG.2B.408 | 1218896 | Dharwah dry | -2.168           | 0.174       | 0.76  | 0.049        | 3.6   | 1.31   |
| 15    | WAR16      | 5         | 2B | 107.01        | LG.2B.408 | 1218896 | Drysdale    | -1.895           | 0.197       | 0.71  |              |       |        |
| 16    | WAR16      | 5         | 2B | 107.01        | LG.2B.408 | 1218896 | EGA Gregory | 1.685            | 0.261       | 0.58  |              |       |        |
| 17    | WAR16      | 5         | 2B | 107.01        | LG.2B.408 | 1218896 | EGA Wylie   | -0.184           | 0.478       | 0.32  |              |       |        |
| 18    | WAR16      | 5         | 2B | 107.01        | LG.2B.408 | 1218896 | FAC10.16    | 0.06             | 0.493       | 0.31  |              |       |        |
| 19    | WAR16      | 5         | 2B | 107.01        | LG.2B.408 | 1218896 | Mace        | 2.653            | 0.056       | 1.25  |              |       |        |
| 20    | WAR16      | 5         | 2B | 107.01        | LG.2B.408 | 1218896 | UQ114       | -0.366           | 0.457       | 0.34  |              |       |        |
| 21    | WAR16      | 5         | 2B | 107.01        | LG.2B.408 | 1218896 | SB062       | 3.924            | 0.043       | 1.37  |              |       |        |
| 22    | WAR16      | 5         | 2B | 107.01        | LG.2B.408 | 1218896 | SeriM82     | -4.3             | 0.028       | 1.55  |              |       |        |
| 23    | WAR16      | 5         | 2B | 107.01        | LG.2B.408 | 1218896 | Suntop      | -0.474           | 0.428       | 0.37  |              |       |        |
| 24    | WAR16      | 5         | 2B | 107.01        | LG.2B.408 | 1218896 | Westonia    | 1.211            | 0.314       | 0.5   |              |       |        |
| 25    | WAR16      | 5         | 2B | 107.01        | LG.2B.408 | 1218896 | ZWB10.37    | -0.147           | 0.482       | 0.32  |              |       |        |
| 26    | WAR16      | 5         | 2B | 107.01        | LG.2B.408 | 1218896 | ZWW10.50    | 0                | 0.5         | 0.3   |              |       |        |
| 27    | WAR16      | 3         | 3A | 151.45        | LG.3A.193 | 1021077 | Dharwah dry | 0.849            | 0.396       | 0.4   | 0.006        | 3     | 2.23   |
| 28    | WAR16      | 3         | 3A | 151.45        | LG.3A.193 | 1021077 | Drysdale    | 5.129            | 0.003       | 2.54  |              |       |        |
| 29    | WAR16      | 3         | 3A | 151.45        | LG.3A.193 | 1021077 | EGA Gregory | -0.127           | 0.485       | 0.31  |              |       |        |

| Order | Experiment | Iteration | LG | Distance (cm) | Marker    | CloneID | Founder     | Founder Specific |             |       | Overall      |       |        |
|-------|------------|-----------|----|---------------|-----------|---------|-------------|------------------|-------------|-------|--------------|-------|--------|
|       |            |           |    |               |           |         |             | Size             | Probability | Score | Probability2 | % var | Score2 |
| 30    | WAR16      | 3         | 3A | 151.45        | LG.3A.193 | 1021077 | EGA Wylie   | -3.662           | 0.069       | 1.16  |              |       |        |
| 31    | WAR16      | 3         | 3A | 151.45        | LG.3A.193 | 1021077 | FAC10.16    | 0.057            | 0.493       | 0.31  |              |       |        |
| 32    | WAR16      | 3         | 3A | 151.45        | LG.3A.193 | 1021077 | Mace        | -1.888           | 0.134       | 0.87  |              |       |        |
| 33    | WAR16      | 3         | 3A | 151.45        | LG.3A.193 | 1021077 | UQ114       | -0.348           | 0.458       | 0.34  |              |       |        |
| 34    | WAR16      | 3         | 3A | 151.45        | LG.3A.193 | 1021077 | SB062       | 2.737            | 0.071       | 1.15  |              |       |        |
| 35    | WAR16      | 3         | 3A | 151.45        | LG.3A.193 | 1021077 | SeriM82     | 0.124            | 0.474       | 0.32  |              |       |        |
| 36    | WAR16      | 3         | 3A | 151.45        | LG.3A.193 | 1021077 | Suntop      | -1.026           | 0.265       | 0.58  |              |       |        |
| 37    | WAR16      | 3         | 3A | 151.45        | LG.3A.193 | 1021077 | Westonia    | -1.336           | 0.294       | 0.53  |              |       |        |
| 38    | WAR16      | 3         | 3A | 151.45        | LG.3A.193 | 1021077 | ZWB10.37    | -0.51            | 0.434       | 0.36  |              |       |        |
| 39    | WAR16      | 3         | 3A | 151.45        | LG.3A.193 | 1021077 | ZWW10.50    | 0                | 0.5         | 0.3   |              |       |        |
| 40    | WAR16      | 10        | 3D | 149.01        | LG.3D.42  | 998291  | Dharwah dry | 3.012            | 0.073       | 1.14  | 0.826        | 1.5   | 0.08   |
| 41    | WAR16      | 10        | 3D | 149.01        | LG.3D.42  | 998291  | Drysdale    | 0.403            | 0.446       | 0.35  |              |       |        |
| 42    | WAR16      | 10        | 3D | 149.01        | LG.3D.42  | 998291  | EGA Gregory | -0.105           | 0.486       | 0.31  |              |       |        |
| 43    | WAR16      | 10        | 3D | 149.01        | LG.3D.42  | 998291  | EGA Wylie   | -0.144           | 0.481       | 0.32  |              |       |        |
| 44    | WAR16      | 10        | 3D | 149.01        | LG.3D.42  | 998291  | FAC10.16    | 0.047            | 0.494       | 0.31  |              |       |        |
| 45    | WAR16      | 10        | 3D | 149.01        | LG.3D.42  | 998291  | Mace        | -2.689           | 0.121       | 0.92  |              |       |        |
| 46    | WAR16      | 10        | 3D | 149.01        | LG.3D.42  | 998291  | UQ114       | -0.287           | 0.462       | 0.34  |              |       |        |
| 47    | WAR16      | 10        | 3D | 149.01        | LG.3D.42  | 998291  | SB062       | 0.16             | 0.479       | 0.32  |              |       |        |
| 48    | WAR16      | 10        | 3D | 149.01        | LG.3D.42  | 998291  | SeriM82     | -0.457           | 0.439       | 0.36  |              |       |        |
| 49    | WAR16      | 10        | 3D | 149.01        | LG.3D.42  | 998291  | Suntop      | 0.379            | 0.435       | 0.36  |              |       |        |
| 50    | WAR16      | 10        | 3D | 149.01        | LG.3D.42  | 998291  | Westonia    | -0.203           | 0.473       | 0.33  |              |       |        |
| 51    | WAR16      | 10        | 3D | 149.01        | LG.3D.42  | 998291  | ZWB10.37    | -0.115           | 0.485       | 0.31  |              |       |        |
| 52    | WAR16      | 10        | 3D | 149.01        | LG.3D.42  | 998291  | ZWW10.50    | 0                | 0.5         | 0.3   |              |       |        |
| 53    | WAR16      | 7         | 4B | 35.55         | LG.4B.34  | 4010028 | Dharwah dry | -1.682           | 0.247       | 0.61  | 0.172        | 3.9   | 0.76   |
| 54    | WAR16      | 7         | 4B | 35.55         | LG.4B.34  | 4010028 | Drysdale    | 3.564            | 0.065       | 1.18  |              |       |        |
| 55    | WAR16      | 7         | 4B | 35.55         | LG.4B.34  | 4010028 | EGA Gregory | -0.122           | 0.485       | 0.31  |              |       |        |
| 56    | WAR16      | 7         | 4B | 35.55         | LG.4B.34  | 4010028 | EGA Wylie   | -0.168           | 0.479       | 0.32  |              |       |        |
| 57    | WAR16      | 7         | 4B | 35.55         | LG.4B.34  | 4010028 | FAC10.16    | 0.055            | 0.493       | 0.31  |              |       |        |
| 58    | WAR16      | 7         | 4B | 35.55         | LG.4B.34  | 4010028 | Mace        | 3.339            | 0.065       | 1.19  |              |       |        |
| 59    | WAR16      | 7         | 4B | 35.55         | LG.4B.34  | 4010028 | UQ114       | -0.335           | 0.459       | 0.34  |              |       |        |
| 60    | WAR16      | 7         | 4B | 35.55         | LG.4B.34  | 4010028 | SB062       | -1.883           | 0.219       | 0.66  |              |       |        |
| 61    | WAR16      | 7         | 4B | 35.55         | LG.4B.34  | 4010028 | SeriM82     | -0.079           | 0.487       | 0.31  |              |       |        |
| 62    | WAR16      | 7         | 4B | 35.55         | LG.4B.34  | 4010028 | Suntop      | -2.319           | 0.138       | 0.86  |              |       |        |
| 63    | WAR16      | 7         | 4B | 35.55         | LG.4B.34  | 4010028 | Westonia    | -0.236           | 0.471       | 0.33  |              |       |        |
| 64    | WAR16      | 7         | 4B | 35.55         | LG.4B.34  | 4010028 | ZWB10.37    | -0.135           | 0.483       | 0.32  |              |       |        |
| 65    | WAR16      | 7         | 4B | 35.55         | LG.4B.34  | 4010028 | ZWW10.50    | 0                | 0.5         | 0.3   |              |       |        |
| 66    | WAR16      | 6         | 4D | 50.96         | LG.4D.16  | 1161775 | Dharwah dry | 1.803            | 0.219       | 0.66  | 0.118        | 3.7   | 0.93   |
| 67    | WAR16      | 6         | 4D | 50.96         | LG.4D.16  | 1161775 | Drysdale    | -1.002           | 0.326       | 0.49  |              |       |        |
| 68    | WAR16      | 6         | 4D | 50.96         | LG.4D.16  | 1161775 | EGA Gregory | -0.133           | 0.484       | 0.32  |              |       |        |
| 69    | WAR16      | 6         | 4D | 50.96         | LG.4D.16  | 1161775 | EGA Wylie   | -0.183           | 0.478       | 0.32  |              |       |        |
| 70    | WAR16      | 6         | 4D | 50.96         | LG.4D.16  | 1161775 | FAC10.16    | 0.06             | 0.493       | 0.31  |              |       |        |
| 71    | WAR16      | 6         | 4D | 50.96         | LG.4D.16  | 1161775 | Mace        | -3.025           | 0.035       | 1.46  |              |       |        |
| 72    | WAR16      | 6         | 4D | 50.96         | LG.4D.16  | 1161775 | UQ114       | -0.366           | 0.457       | 0.34  |              |       |        |
| 73    | WAR16      | 6         | 4D | 50.96         | LG.4D.16  | 1161775 | SB062       | -2.085           | 0.182       | 0.74  |              |       |        |
| 74    | WAR16      | 6         | 4D | 50.96         | LG.4D.16  | 1161775 | SeriM82     | 4.911            | 0.016       | 1.78  |              |       |        |
| 75    | WAR16      | 6         | 4D | 50.96         | LG.4D.16  | 1161775 | Suntop      | 1.344            | 0.343       | 0.47  |              |       |        |
| 76    | WAR16      | 6         | 4D | 50.96         | LG.4D.16  | 1161775 | Westonia    | -1.176           | 0.317       | 0.5   |              |       |        |
| 77    | WAR16      | 6         | 4D | 50.96         | LG.4D.16  | 1161775 | ZWB10.37    | -0.147           | 0.482       | 0.32  |              |       |        |
| 78    | WAR16      | 6         | 4D | 50.96         | LG.4D.16  | 1161775 | ZWW10.50    | 0                | 0.5         | 0.3   |              |       |        |
| 79    | WAR16      | 11        | 5B | 30.46         | LG.5B.89  | 1092379 | Dharwah dry | -0.369           | 0.399       | 0.4   | 0.696        | 1     | 0.16   |
| 80    | WAR16      | 11        | 5B | 30.46         | LG.5B.89  | 1092379 | Drysdale    | -0.348           | 0.401       | 0.4   |              |       |        |
| 81    | WAR16      | 11        | 5B | 30.46         | LG.5B.89  | 1092379 | EGA Gregory | -0.03            | 0.493       | 0.31  |              |       |        |
| 82    | WAR16      | 11        | 5B | 30.46         | LG.5B.89  | 1092379 | EGA Wylie   | -0.13            | 0.464       | 0.33  |              |       |        |
| 83    | WAR16      | 11        | 5B | 30.46         | LG.5B.89  | 1092379 | FAC10.16    | 0.156            | 0.455       | 0.34  |              |       |        |
| 84    | WAR16      | 11        | 5B | 30.46         | LG.5B.89  | 1092379 | Mace        | 0.269            | 0.426       | 0.37  |              |       |        |
| 85    | WAR16      | 11        | 5B | 30.46         | LG.5B.89  | 1092379 | UQ114       | 0.317            | 0.411       | 0.39  |              |       |        |
| 86    | WAR16      | 11        | 5B | 30.46         | LG.5B.89  | 1092379 | SB062       | -0.08            | 0.477       | 0.32  |              |       |        |
| 87    | WAR16      | 11        | 5B | 30.46         | LG.5B.89  | 1092379 | SeriM82     | -1.031           | 0.232       | 0.63  |              |       |        |
| 88    | WAR16      | 11        | 5B | 30.46         | LG.5B.89  | 1092379 | Suntop      | 2.254            | 0.01        | 2     |              |       |        |
| 89    | WAR16      | 11        | 5B | 30.46         | LG.5B.89  | 1092379 | Westonia    | -0.057           | 0.486       | 0.31  |              |       |        |
| 90    | WAR16      | 11        | 5B | 30.46         | LG.5B.89  | 1092379 | ZWB10.37    | -0.95            | 0.252       | 0.6   |              |       |        |
| 91    | WAR16      | 11        | 5B | 30.46         | LG.5B.89  | 1092379 | ZWW10.50    | 0                | 0.5         | 0.3   |              |       |        |
| 92    | WAR16      | 9         | 6A | 17.57         | LG.6A.23  | 1096778 | Dharwah dry | -3.2             | 0.119       | 0.92  | 0.497        | 4.7   | 0.3    |
| 93    | WAR16      | 9         | 6A | 17.57         | LG.6A.23  | 1096778 | Drysdale    | 0.766            | 0.423       | 0.37  |              |       |        |
| 94    | WAR16      | 9         | 6A | 17.57         | LG.6A.23  | 1096778 | EGA Gregory | -0.199           | 0.48        | 0.32  |              |       |        |
| 95    | WAR16      | 9         | 6A | 17.57         | LG.6A.23  | 1096778 | EGA Wylie   | -0.274           | 0.473       | 0.33  |              |       |        |
| 96    | WAR16      | 9         | 6A | 17.57         | LG.6A.23  | 1096778 | FAC10.16    | 0.089            | 0.491       | 0.31  |              |       |        |
| 97    | WAR16      | 9         | 6A | 17.57         | LG.6A.23  | 1096778 | Mace        | 5.432            | 0.034       | 1.47  |              |       |        |
| 98    | WAR16      | 9         | 6A | 17.57         | LG.6A.23  | 1096778 | UQ114       | -0.546           | 0.446       | 0.35  |              |       |        |
| 99    | WAR16      | 9         | 6A | 17.57         | LG.6A.23  | 1096778 | SB062       | 0.304            | 0.47        | 0.33  |              |       |        |
| 100   | WAR16      | 9         | 6A | 17.57         | LG.6A.23  | 1096778 | SeriM82     | -0.869           | 0.414       | 0.38  |              |       |        |
| 101   | WAR16      | 9         | 6A | 17.57         | LG.6A.23  | 1096778 | Suntop      | -0.898           | 0.381       | 0.42  |              |       |        |
| 102   | WAR16      | 9         | 6A | 17.57         | LG.6A.23  | 1096778 | Westonia    | -0.386           | 0.462       | 0.34  |              |       |        |
| 103   | WAR16      | 9         | 6A | 17.57         | LG.6A.23  | 1096778 | ZWB10.37    | -0.22            | 0.478       | 0.32  |              |       |        |
| 104   | WAR16      | 9         | 6A | 17.57         | LG.6A.23  | 1096778 | ZWW10.50    | 0                | 0.5         | 0.3   |              |       |        |
| 105   | WAR16      | 1         | 6B | 78.29         | LG.6B.204 | 4539744 | Dharwah dry | 2.481            | 0.313       | 0.5   | 0.002        | 17.6  | 2.74   |
| 106   | WAR16      | 1         | 6B | 78.29         | LG.6B.204 | 4539744 | Drysdale    | 4.418            | 0.093       | 1.03  |              |       |        |
| 107   | WAR16      | 1         | 6B | 78.29         | LG.6B.204 | 4539744 | EGA Gregory | -0.37            | 0.472       | 0.33  |              |       |        |
| 108   | WAR16      | 1         | 6B | 78.29         | LG.6B.204 | 4539744 | EGA Wylie   | -0.509           | 0.461       | 0.34  |              |       |        |
| 109   | WAR16      | 1         | 6B | 78.29         | LG.6B.204 | 4539744 | FAC10.16    | 0.166            | 0.487       | 0.31  |              |       |        |
| 110   | WAR16      | 1         | 6B | 78.29         | LG.6B.204 | 4539744 | Mace        | 4.69             | 0.095       | 1.02  |              |       |        |

| Order | Experiment | Iteration | LG | Distance (cM) | Marker    | CloneID | Founder     | Founder Specific |             |       | Overall      |       |        |  |
|-------|------------|-----------|----|---------------|-----------|---------|-------------|------------------|-------------|-------|--------------|-------|--------|--|
|       |            |           |    |               |           |         |             | Size             | Probability | Score | Probability2 | % var | Score2 |  |
| 111   | WAR16      | 1         | 6B | 78.29         | LG.6B.204 | 4539744 | UQ114       | -1.016           | 0.424       | 0.37  |              |       |        |  |
| 112   | WAR16      | 1         | 6B | 78.29         | LG.6B.204 | 4539744 | SB062       | 0.566            | 0.456       | 0.34  |              |       |        |  |
| 113   | WAR16      | 1         | 6B | 78.29         | LG.6B.204 | 4539744 | SeriM82     | -1.618           | 0.377       | 0.42  |              |       |        |  |
| 114   | WAR16      | 1         | 6B | 78.29         | LG.6B.204 | 4539744 | Suntop      | -7.682           | 0.016       | 1.81  |              |       |        |  |
| 115   | WAR16      | 1         | 6B | 78.29         | LG.6B.204 | 4539744 | Westonia    | -0.717           | 0.445       | 0.35  |              |       |        |  |
| 116   | WAR16      | 1         | 6B | 78.29         | LG.6B.204 | 4539744 | ZWB10.37    | -0.409           | 0.469       | 0.33  |              |       |        |  |
| 117   | WAR16      | 1         | 6B | 78.29         | LG.6B.204 | 4539744 | ZWW10.50    | 0                | 0.5         | 0.3   |              |       |        |  |
| 118   | WAR16      | 4         | 7A | 149.56        | LG.7A.216 | 1216524 | Dharwah dry | 5.686            | 0.03        | 1.53  | 0.008        | 9.5   | 2.11   |  |
| 119   | WAR16      | 4         | 7A | 149.56        | LG.7A.216 | 1216524 | Drysdale    | -6.715           | 0.009       | 2.05  |              |       |        |  |
| 120   | WAR16      | 4         | 7A | 149.56        | LG.7A.216 | 1216524 | EGA Gregory | -0.292           | 0.476       | 0.32  |              |       |        |  |
| 121   | WAR16      | 4         | 7A | 149.56        | LG.7A.216 | 1216524 | EGA Wylie   | -0.402           | 0.466       | 0.33  |              |       |        |  |
| 122   | WAR16      | 4         | 7A | 149.56        | LG.7A.216 | 1216524 | FAC10.16    | 0.131            | 0.489       | 0.31  |              |       |        |  |
| 123   | WAR16      | 4         | 7A | 149.56        | LG.7A.216 | 1216524 | Mace        | -3.424           | 0.064       | 1.19  |              |       |        |  |
| 124   | WAR16      | 4         | 7A | 149.56        | LG.7A.216 | 1216524 | UQ114       | -0.801           | 0.434       | 0.36  |              |       |        |  |
| 125   | WAR16      | 4         | 7A | 149.56        | LG.7A.216 | 1216524 | SB062       | -1.378           | 0.318       | 0.5   |              |       |        |  |
| 126   | WAR16      | 4         | 7A | 149.56        | LG.7A.216 | 1216524 | SeriM82     | 5.032            | 0.044       | 1.36  |              |       |        |  |
| 127   | WAR16      | 4         | 7A | 149.56        | LG.7A.216 | 1216524 | Suntop      | 2.945            | 0.264       | 0.58  |              |       |        |  |
| 128   | WAR16      | 4         | 7A | 149.56        | LG.7A.216 | 1216524 | Westonia    | -0.459           | 0.44        | 0.36  |              |       |        |  |
| 129   | WAR16      | 4         | 7A | 149.56        | LG.7A.216 | 1216524 | ZWB10.37    | -0.322           | 0.473       | 0.33  |              |       |        |  |
| 130   | WAR16      | 4         | 7A | 149.56        | LG.7A.216 | 1216524 | ZWW10.50    | 0                | 0.5         | 0.3   |              |       |        |  |
| 131   | WAR16      | 8         | 7B | 104.5         | LG.7B.176 | 1089670 | Dharwah dry | 5.243            | 0.041       | 1.39  | 0.162        | 7.1   | 0.79   |  |
| 132   | WAR16      | 8         | 7B | 104.5         | LG.7B.176 | 1089670 | Drysdale    | 1.041            | 0.408       | 0.39  |              |       |        |  |
| 133   | WAR16      | 8         | 7B | 104.5         | LG.7B.176 | 1089670 | EGA Gregory | -0.27            | 0.477       | 0.32  |              |       |        |  |
| 134   | WAR16      | 8         | 7B | 104.5         | LG.7B.176 | 1089670 | EGA Wylie   | -0.372           | 0.468       | 0.33  |              |       |        |  |
| 135   | WAR16      | 8         | 7B | 104.5         | LG.7B.176 | 1089670 | FAC10.16    | 0.122            | 0.49        | 0.31  |              |       |        |  |
| 136   | WAR16      | 8         | 7B | 104.5         | LG.7B.176 | 1089670 | Mace        | -5.618           | 0.048       | 1.31  |              |       |        |  |
| 137   | WAR16      | 8         | 7B | 104.5         | LG.7B.176 | 1089670 | UQ114       | -0.742           | 0.436       | 0.36  |              |       |        |  |
| 138   | WAR16      | 8         | 7B | 104.5         | LG.7B.176 | 1089670 | SB062       | 0.413            | 0.464       | 0.33  |              |       |        |  |
| 139   | WAR16      | 8         | 7B | 104.5         | LG.7B.176 | 1089670 | SeriM82     | -1.181           | 0.398       | 0.4   |              |       |        |  |
| 140   | WAR16      | 8         | 7B | 104.5         | LG.7B.176 | 1089670 | Suntop      | 2.187            | 0.253       | 0.6   |              |       |        |  |
| 141   | WAR16      | 8         | 7B | 104.5         | LG.7B.176 | 1089670 | Westonia    | -0.524           | 0.454       | 0.34  |              |       |        |  |
| 142   | WAR16      | 8         | 7B | 104.5         | LG.7B.176 | 1089670 | ZWB10.37    | -0.298           | 0.474       | 0.32  |              |       |        |  |
| 143   | WAR16      | 8         | 7B | 104.5         | LG.7B.176 | 1089670 | ZWW10.50    | 0                | 0.5         | 0.3   |              |       |        |  |
